# Supplementary material for: A self-protection phenomenon in the Nafion membrane when it breathes in methanol-saturated air
Source: Royal Society of Chemistry journal article supplement (doi:10.1039/c6cp03176e), 2016-01-01
Supplement: c6cp03176e1.pdf [file c6cp03176e1.pdf]

## Supporting Information for

# **A self-protection phenomenon in the Nafion membrane when it breaths in methanol-saturated air**

Kai Feng, Beibei Tang\* and Peiyi Wu\*

State Key Laboratory of Molecular Engineering of Polymers, Collaborative Innovation Center of Polymers and Polymer Composite Materials, Department of Macromolecular Science and Laboratory of Advanced Materials, Fudan University, Shanghai 200433, P. R. China.

E-mail: bbtang@fudan.edu.cn and peiyiwu@fudan.edu.cn. Tel.: +86-21-65643255. Fax: +86-21-65640293.

## ■ Supporting results

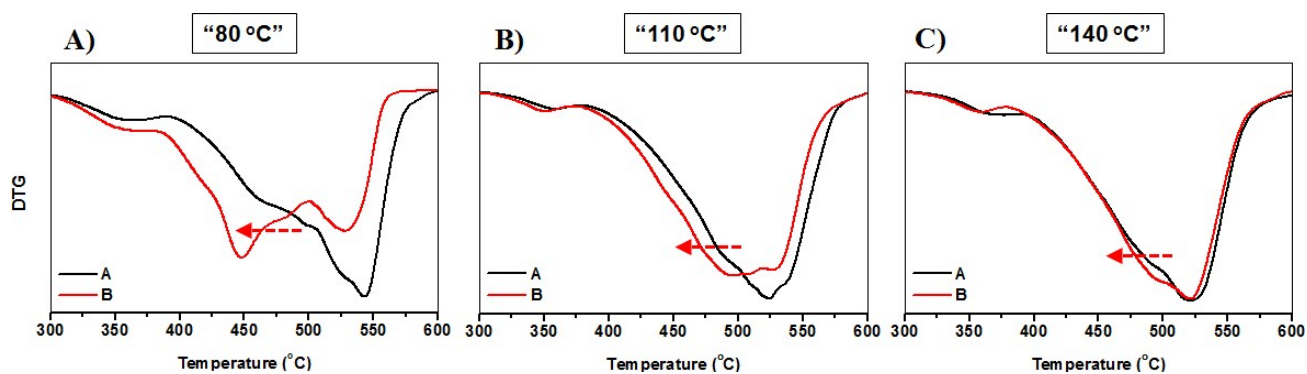

**Fig. S1** (A) DTG curves of the completely dry “80 °C”, “110 °C” and “140 °C” Nafion membranes; (B) DTG curves of the completely dry “80 °C”, “110 °C” and “140 °C” Nafion membranes which have been immersed in the MeOH-saturated air environment under 35 °C for 2 h. Test conditions: N<sub>2</sub>, 20 °C/min.
